# Supplementary material for: Plasma Levels of mir-34a-5p Correlate with Systemic Inflammation and Low Naïve CD4 T Cells in Common Variable Immunodeficiency
Source: Springer Nature journal article supplement (doi:10.1007/s10875-023-01618-0), 2023-12-22
Supplement: MOESM1 [file 26558694]

## Supplementary figures 1-4

### Plasma levels of mir-34a-5p correlate with systemic inflammation and low naïve CD4 T cells in common variable immunodeficiency

Sofia Nyström<sup>1,2\*</sup>, Jonas Hultberg<sup>2</sup>, Emelie Blixt<sup>1</sup>, Åsa Nilsson-Augustinsson<sup>3</sup> and Marie Larsson<sup>2</sup>

<sup>1</sup>Clinical Immunology and Transfusion Medicine, Department of Biomedical and Clinical Sciences, Linköping University, Linköping, Sweden

<sup>2</sup>Division of molecular medicine and virology, Department of Biomedical and Clinical Sciences, Linköping University, Linköping, Sweden

<sup>3</sup>Division of inflammation and infections, Department of Biomedical and Clinical Sciences, Linköping University, Linköping, Sweden

\*Corresponding author: [sofia.c.nystrom@liu.se](mailto:sofia.c.nystrom@liu.se)

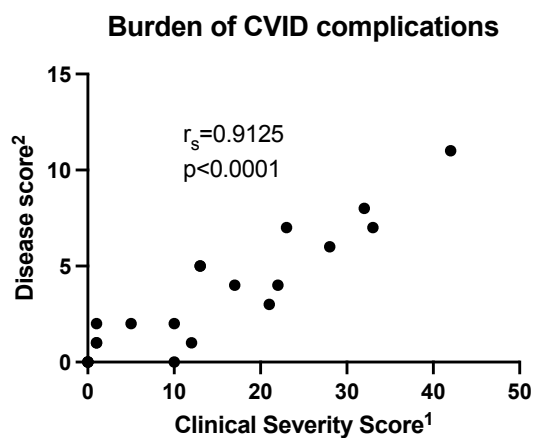

**Fig S1. Validation of the CVID disease scoring system.** Correlations of the CVID-related immune dysregulation scoring system used in this study (2) with an independent, more extensive CVID disease scoring system introduced by Ameratunga in 2018 (1).

1. **Ameratunga R.** Assessing Disease Severity in Common Variable Immunodeficiency Disorders (CVID) and CVID-Like Disorders. *Front Immunol.* 2018 Sep 28;9:2130. doi: 10.3389/fimmu.2018.02130. PMID: 30323807; PMCID: PMC6172311.
2. **Hultberg J,** Ernerudh J, Larsson M, Nilsson-Augustinsson Å, Nyström S. Plasma protein profiling reflects TH1-driven immune dysregulation in common variable immunodeficiency. *J Allergy Clin Immunol.* 2020 Aug;146(2):417-428. doi: 10.1016/j.jaci.2020.01.046. Epub 2020 Feb 11. PMID: 32057767.

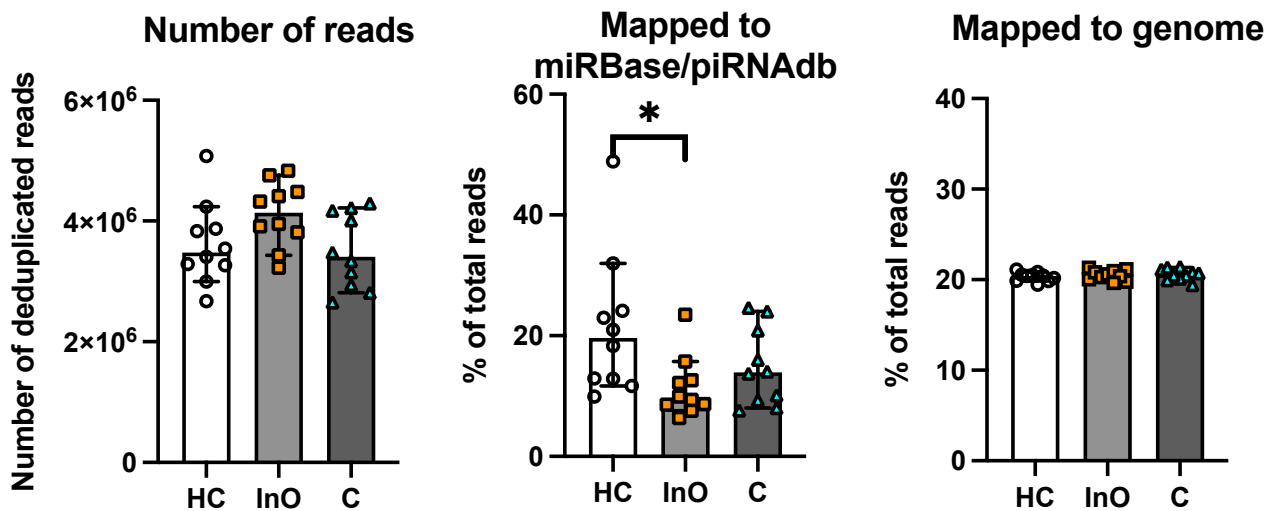

**Fig. S2 miRNA mapping statistics and plasma miRNA pattern.** Number of deduplicated reads and percentages of reads that were mapped to miRBase/piRNAdb and unannotated reads that were mapped to the genome. Kruskal-Wallis test was used for comparisons between groups. HC, healthy controls; InO, CVID infection-only; C, CVID with immune dysregulation complications. \*Indicates  $p < 0.05$  Kruskal-Wallis test with Dunn correction.

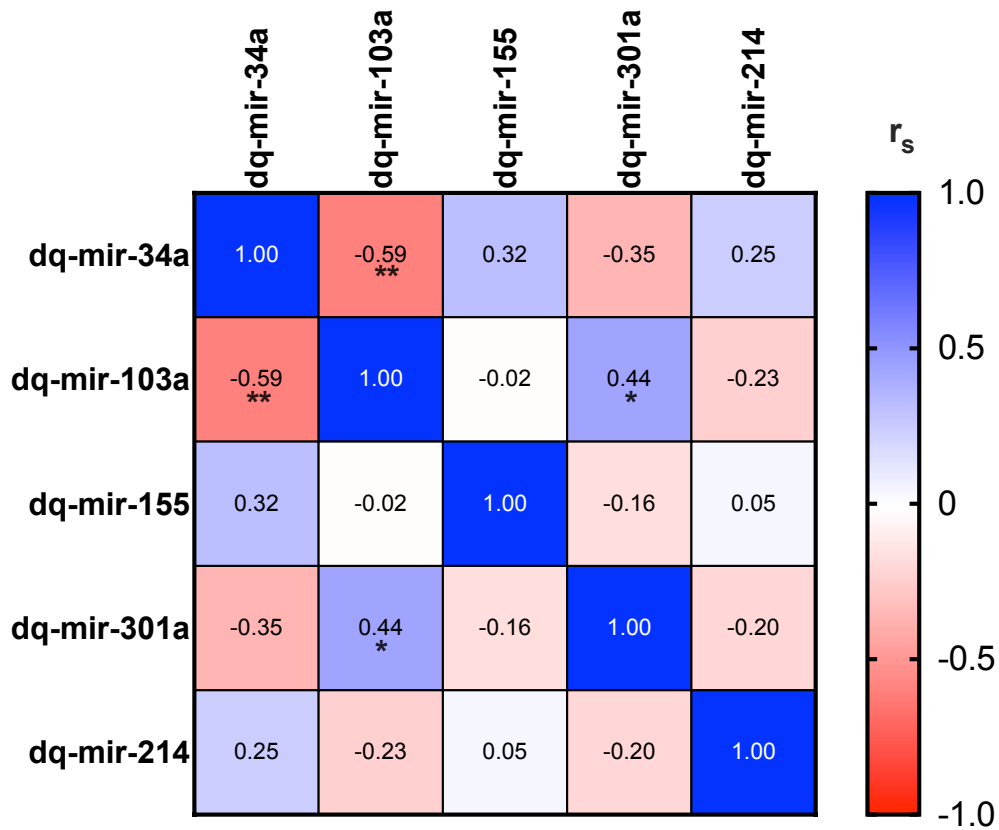

**Fig. S3 Correlation of miRNA dCq plasma levels.** Spearman correlation matrix of deregulated mir dCq levels show negative correlation between miR-103a and miR-34a and positive correlation between miR-103a and miR-301a.  $r_s$ , Spearman correlation; \* $p < 0.05$ ; \*\* $p < 0.01$ .

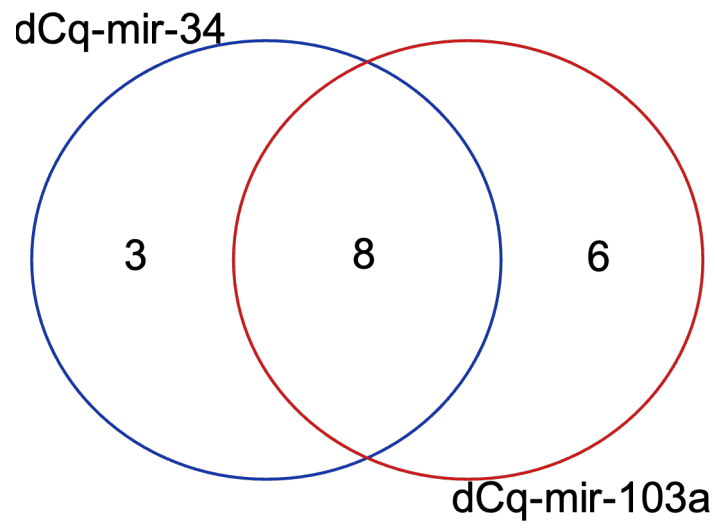

**Fig. S4 Overlap of plasma protein correlating with miRNAs.** Venn diagram of overlap between plasma inflammatory proteins which correlated positively ( $r \geq 0.60$ ,  $p < 0.001$ ) with mir-34a dCq levels and negative ( $r \leq -0.60$ ,  $p < 0.001$ ) with mir-103a dCq levels.
