# Supplementary material for: Plasma Levels of mir-34a-5p Correlate with Systemic Inflammation and Low Naïve CD4 T Cells in Common Variable Immunodeficiency
Source: Springer Nature journal article supplement (doi:10.1007/s10875-023-01618-0), 2023-12-22
Supplement: MOESM2 [file 26558694]

## Supplementary Table S1

### Plasma levels of mir-34a-5p correlate with systemic inflammation and low naïve CD4 T cells in common variable immunodeficiency

Sofia Nyström<sup>1,2\*</sup>, Jonas Hultberg<sup>2</sup>, Emelie Blixt<sup>1</sup>, Åsa Nilsson-Augustinsson<sup>3</sup> and Marie Larsson<sup>2</sup>

<sup>1</sup>Clinical Immunology and Transfusion Medicine, Department of Biomedical and Clinical Sciences, Linköping University, Linköping, Sweden, <sup>2</sup>Division of molecular medicine and virology, Department of Biomedical and Clinical Sciences, Linköping University, Linköping, Sweden, <sup>3</sup>Division of inflammation and infections, Department of Biomedical and Clinical Sciences, Linköping University, Linköping, Sweden

\*Corresponding author: [sofia.c.nystrom@liu.se](mailto:sofia.c.nystrom@liu.se)

#### Table S1 Key Resources

| Reagent or Resource                                        | Source                                                                  | Identifier |
|------------------------------------------------------------|-------------------------------------------------------------------------|------------|
| <b>Biological samples</b>                                  |                                                                         |            |
| Human blood samples (CVID)                                 | Linköping University Hospital, Sweden                                   |            |
| Human blood samples (Healthy donors)                       | Linköping University Hospital, Sweden                                   |            |
| <b>Reagents for flow cytometry</b>                         |                                                                         |            |
| BD Multitest™ reagent CD3/CD8/CD45/CD4 with trucount tubes | <a href="https://wwwbdbiosciences.com">https://wwwbdbiosciences.com</a> | #342447    |
| BD FACS™ lysing solution                                   | <a href="https://wwwbdbiosciences.com">https://wwwbdbiosciences.com</a> | #349202    |

|                                            |                                                                                     |                                                            |
|--------------------------------------------|-------------------------------------------------------------------------------------|------------------------------------------------------------|
| CD45RA-FITC clone L48                      | <a href="https://www.bdbiosciences.com">https://www.bdbiosciences.com</a>           | #335039                                                    |
| CD62L-APC clone Dreg56                     | <a href="https://www.bdbiosciences.com">https://www.bdbiosciences.com</a>           | #559772                                                    |
| CD4-PE-Cy7 clone SK3                       | <a href="https://www.bdbiosciences.com">https://www.bdbiosciences.com</a>           | #557852                                                    |
| CD8-APC-H7 clone SK1                       | <a href="https://www.bdbiosciences.com">https://www.bdbiosciences.com</a>           | #560179                                                    |
| CD3-Horizon V450 clone<br>UCHT1            | <a href="https://www.bdbiosciences.com">https://www.bdbiosciences.com</a>           | #560365                                                    |
| <b>Critical Commercial Reagents/Assays</b> |                                                                                     |                                                            |
| miRNeasy kit                               | <a href="https://www.qiagen.com/">https://www.qiagen.com/</a>                       | #217184                                                    |
| QIAseq miRNA Library Kit                   | <a href="https://www.qiagen.com/">https://www.qiagen.com/</a>                       | #331502                                                    |
| miRCURY LNA RT Kit                         | <a href="https://www.qiagen.com/">https://www.qiagen.com/</a>                       | #339340                                                    |
| Olink Target 96<br>Inflammation panel      | <a href="https://olink.com/">https://olink.com/</a>                                 | vs3021                                                     |
| <b>Deposited Data</b>                      |                                                                                     |                                                            |
|                                            | This paper                                                                          | GEO                                                        |
| <b>Software and Algorithms</b>             |                                                                                     |                                                            |
| Kaluza (software)                          | <a href="https://www.beckman.com">https://www.beckman.com</a>                       | v2.1                                                       |
| Prism (software)                           | <a href="https://www.graphpad.com">https://www.graphpad.com</a>                     | v9.5.0                                                     |
| Qiagen CLC Genomics<br>Server              | <a href="https://digitalinsights.qiagen.com">https://digitalinsights.qiagen.com</a> | v21.0.4<br><a href="#">QIAseq miRNA<br/>quantification</a> |
| Qiagen CLC Genomics<br>Server              | <a href="https://digitalinsights.qiagen.com">https://digitalinsights.qiagen.com</a> | v21.0.4<br><a href="#">RNA-Seq analysis</a>                |

|                                                                                      |                                                                                                                     |                                                          |
|--------------------------------------------------------------------------------------|---------------------------------------------------------------------------------------------------------------------|----------------------------------------------------------|
| Qiagen CLC Genomics<br>Workbench                                                     | <a href="https://digitalinsights.qiagen.com">https://digitalinsights.qiagen.com</a>                                 | v21.0.4<br><br><a href="#">Empirical analysis of DGE</a> |
| DSeq2                                                                                | <a href="https://bioconductor.org">https://bioconductor.org</a>                                                     | v1.28.1                                                  |
| Heatmapper                                                                           | <a href="http://www.heatmapper.ca/">http://www.heatmapper.ca/</a>                                                   | Expression                                               |
| Calculate and draw<br>custom Venn diagrams                                           | <a href="https://bioinformatics.psb.ugent.be/webtools/Venn/">https://bioinformatics.psb.ugent.be/webtools/Venn/</a> |                                                          |
| miRNA Enrichment<br>Analysis and Annotation<br>Tool (miEAA)                          | <a href="https://ccb-compute2.cs.uni-saarland.de/mieaa2/">https://ccb-compute2.cs.uni-saarland.de/mieaa2/</a>       | v2.0                                                     |
| Uniprot                                                                              | <a href="https://www.uniprot.org/">https://www.uniprot.org/</a>                                                     | Release 2022_05                                          |
| STRING: Protein-Protein<br>Interaction Networks<br>Functional Enrichment<br>Analysis | <a href="https://string-db.org/">https://string-db.org/</a>                                                         | Version 11.5                                             |
| GeneTrail Advanced high-<br>throughput enrichment<br>analysis                        | <a href="https://genetrail.bioinf.uni-sb.de">https://genetrail.bioinf.uni-sb.de</a>                                 | Version 3.2                                              |
